# Supplementary material for: High supercapacitive performance of Ni(OH)2/XC-72 composite prepared by microwave-assisted method
Source: Royal Society of Chemistry journal article supplement (doi:10.1039/c5ra04301h), 2015-01-01
Supplement: c5ra04301h1.pdf [file c5ra04301h1.pdf]

## Supplementary Information

### High supercapacitive performance of Ni(OH)<sub>2</sub>/XC-72 composite prepared by microwave-assisted method

Shuihua Tang<sup>1,2,\*</sup>, Leping Sui<sup>1,2</sup>, Zhen Dai<sup>1,3</sup>, Zhentao Zhu<sup>1,2</sup>, Haixin Huang<sup>1,2</sup>

<sup>1</sup>State Key Lab of Oil and Gas Reservoir Geology & Exploitation, Southwest Petroleum University, Chengdu 610500, China

<sup>2</sup>School of Materials Science and Engineering, Southwest Petroleum University, Chengdu 610500, China

<sup>3</sup>School of Chemistry and Chemical Engineering, Southwest Petroleum University, Chengdu 610500, China

\*Corresponding author. E-mail: [shuihuatang@swpu.edu.cn](mailto:shuihuatang@swpu.edu.cn), Tel/Fax: +86-2883032879 (S H Tang);

Ni(OH)<sub>2</sub>/XC-72 composite with no conductive agent are as follows:

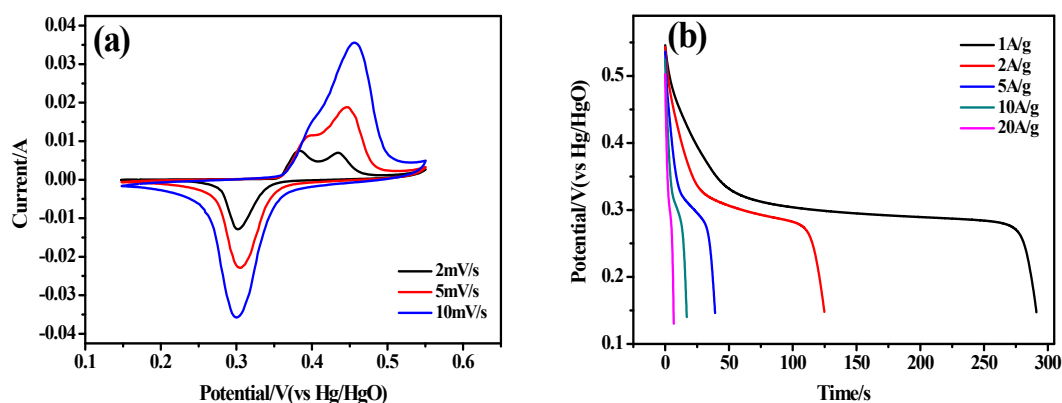

**Fig.S1** Electrochemical performances of Ni(OH)<sub>2</sub>/XC-72 with no conductive agent. (a) CV curves at different scan rates (b) Discharge curves at various current densities.

Data of Ni(OH)<sub>2</sub>/XC-72 with no conductive agent at various current densities.

| Current density      | A/g | 1   | 2   | 5   | 10  |
|----------------------|-----|-----|-----|-----|-----|
| Specific capacitance | F/g | 728 | 624 | 489 | 403 |

About the data reproducibility, we have prepared three 60 wt% Ni(OH)<sub>2</sub>/XC-72 samples under identical experimental conditions, the results are shown as follows:

Note: The three samples of Ni(OH)<sub>2</sub>/XC-72 composite were measured using CNTs as conductive agent.

1. Composite synthesized Date : 2014-5-20

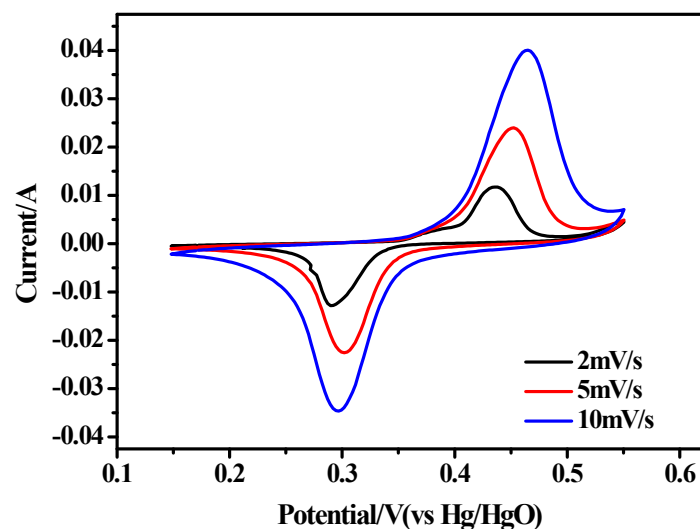

Fig. S2 CV curves of XC-CNT electrode at different scan rates. Active material is 1 mg/cm<sup>2</sup>

|                            |      |      |     |
|----------------------------|------|------|-----|
| Scan rate (mV/s)           | 2    | 5    | 10  |
| Specific capacitance (F/g) | 1278 | 1096 | 945 |

2. Composite synthesized Date : 2014-5-28

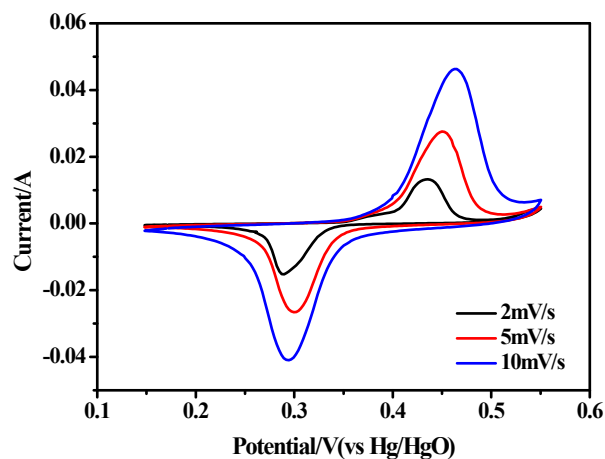

Fig. S3 CV curves of XC-CNT electrode at different scan rates. Active material is 1 mg/cm<sup>2</sup>

|                            |      |      |     |
|----------------------------|------|------|-----|
| Scan rate (mV/s)           | 2    | 5    | 10  |
| Specific capacitance (F/g) | 1343 | 1154 | 954 |

3. Date : 2014-6-8

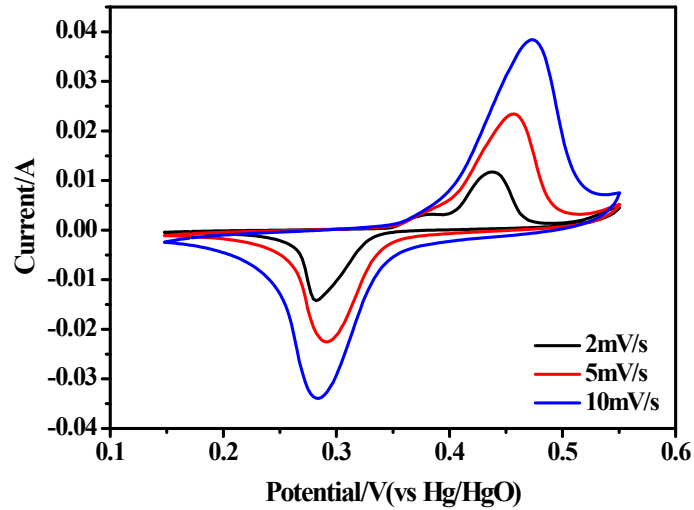

**Fig. S4** CV curves of XC-CNT electrode at different scan rates. Active material is 1 mg/cm<sup>2</sup>

|                            |      |      |     |
|----------------------------|------|------|-----|
| Scan rate (mV/s)           | 2    | 5    | 10  |
| Specific capacitance (F/g) | 1250 | 1088 | 930 |

**SD & RSD are calculated by the specific capacitances of three samples at scan rate of 2 mV s<sup>-1</sup>**

|                               |            |      |      |
|-------------------------------|------------|------|------|
| Sample No.                    | 1          | 2    | 3    |
| Specific capacitance (F/g)    | 1278       | 1343 | 1250 |
| Average specific capacitance: | 1290.3 F/g |      |      |
| Standard Deviation:           | 47.7 F/g   |      |      |
| Relative Standard Deviation:  | 3.7%       |      |      |

**From the data above, we can draw a conclusion that the reproducibility is good enough.**

The details of the microwave oven used are as bellow:

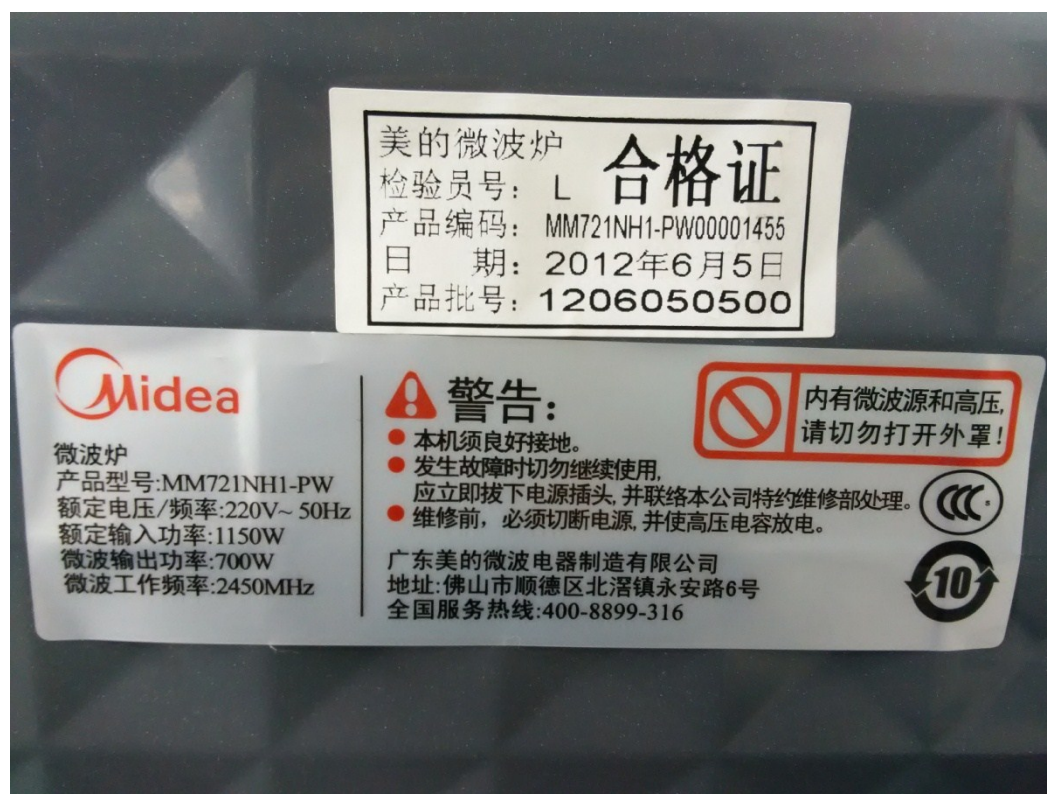

|                                |                      |
|--------------------------------|----------------------|
| The Manufacturer:              | Midea Group Co. Ltd. |
| Product Model:                 | MM721NH1-PW          |
| The Rated Voltage/Frequency:   | 220 V- 50 Hz         |
| The Rated Power Input:         | 1150 W               |
| The Output Power of Microwave: | 700 W                |
| Microwave Working Frequency:   | 2450 MHz             |

In our experiments, the Ni(OH)<sub>2</sub>/XC-72 composite were synthesized by power of 700 W during the microwave heating process.
